# Supplementary material for: Therapeutic effect of regulating autophagy in spinal cord injury: a network meta-analysis of direct and indirect comparisons
Source: PubMed Central journal article supplement — Neural Regen Res. 2019 Dec 10;15(6):1120–32. doi: 10.4103/1673-5374.270419 (PMC7034290; doi:10.4103/1673-5374.270419), 2019-12-10
Supplement: NRR-15-1120_Suppl1.pdf [file NRR-15-1120_Suppl1.pdf]

## OPEN PEER REVIEW REPORT 1

**Name of journal:** Neural Regeneration Research

**Manuscript NO:** NRR-D-18-00855

**Title:** Therapeutic effect of regulating autophagy for spinal cord injury in rat model: a strategic review and network meta-analysis

**Reviewer's Name:** Warin Krityakiarana

**Reviewer's country:** Thailand

**Date sent for review:** 2019-01-11

**Date reviewed:** 2019-01-28

### COMMENTS TO AUTHORS

**Strength:** The systematic review and meta-analysis in autophagy for spinal cord injury in rat model will help to understand and see the clear picture of autophagy effect on neurological function.

**Weakness:** The clear data presentation (number of papers) and explanation will help reader to trust the results.

One interesting point is the data was included from 33 studies (Line 49, P2). However, the information on Table 1 "Characteristics of the included animal studies" was presented 40 papers. This point is important and the re-consideration of data should be performed to ensure that the data were gathering from 33 or 40 papers. Moreover, the number of data related to statistical analysis should be re-considered.
